# Supplementary material for: One-pot synthesis of tin chalcogenide-reduced graphene oxide-carbon nanotube nanocomposite as anode material for lithium-ion batteries
Source: Royal Society of Chemistry journal article supplement (doi:10.1039/d0dt00857e), 2020-01-01
Supplement: d0dt00857e1.pdf [file d0dt00857e1.pdf]

**Electronic Supplementary Information**

**One-pot Synthesis of Tin Chalcogenide-Reduced Graphene Oxide-Carbon Nanotube Nanocomposite as Anode Material for Lithium-ion Batteries**

Azam Abbasnezhad, Hamed Asgharzadeh, Ali Ansari Hamedani, and Serap Hayat Soytaş

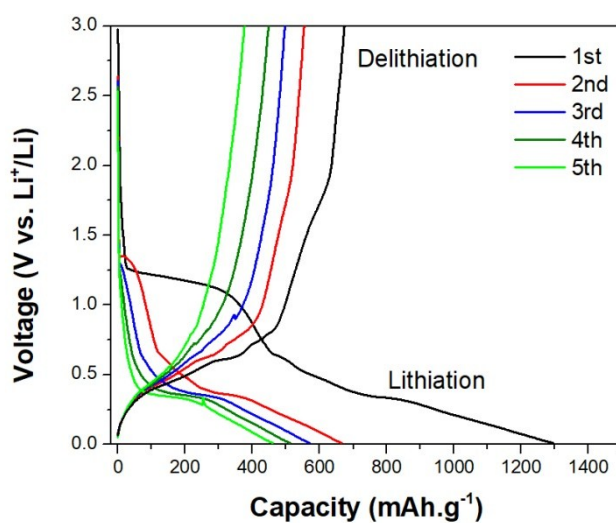

Fig. S1. Discharge/charge curves of the first five cycles for the bare TC.
